# Supplementary material for: The ETS transcription factor Spi2 regulates hematopoietic cell development in zebrafish
Source: Oxford University Press journal article supplement (doi:10.1242/dev.200881), 2022-09-30
Supplement: dev200881supp.pdf [file dev200881supp.pdf]

## Figure S1

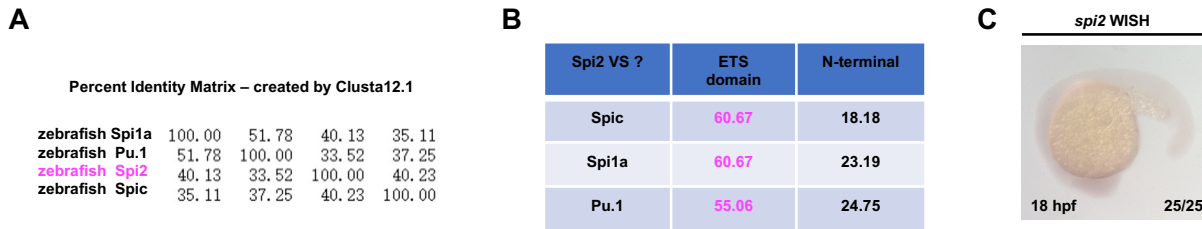

**Fig. S1. Protein sequence comparison of zebrafish Spi-family members and *spi2* WISH in zebrafish embryonic hematopoiesis.**

(A) Protein sequence comparison of Spi2 with other *spi*-family members in zebrafish. (B) N-terminal and C-terminal (Ets domain) protein sequence comparison. (C) WISH of *spi2* at 18 hpf.

## Figure S2

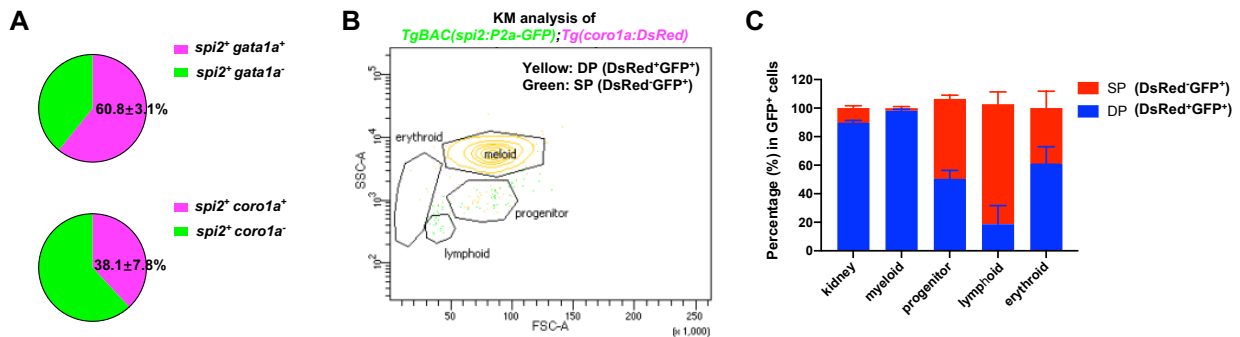

**Fig. S2. FACS analysis of whole KM of adult *TgBAC(spi2:P2a-GFP);Tg(coro1a:DsRed)* zebrafish.**

(A) Pie charts showing the quantification percentage (%±SD) of *spi2<sup>+</sup> gata1a<sup>+</sup>* cells in *spi2<sup>+</sup>* cells (fish n = 5) or *spi2<sup>+</sup> coro1a<sup>+</sup>* cells in *spi2<sup>+</sup>* cells (fish n = 10) in CHT at 3 dpf. (B) Representative FACS analysis of the whole KM of adult *TgBAC(spi2:P2a-GFP);Tg(coro1a:DsRed)* fish. *spi2* expressing cells are marked by GFP, whereas leukocytes are labeled by DsRed. (C) Quantification of the percentage of GFP<sup>+</sup>DsRed<sup>+</sup> in total GFP<sup>+</sup> cells in each gate in B. Data are representative of three independent experiments (4 biological replicates) and represented as mean ± SD.

Figure S3

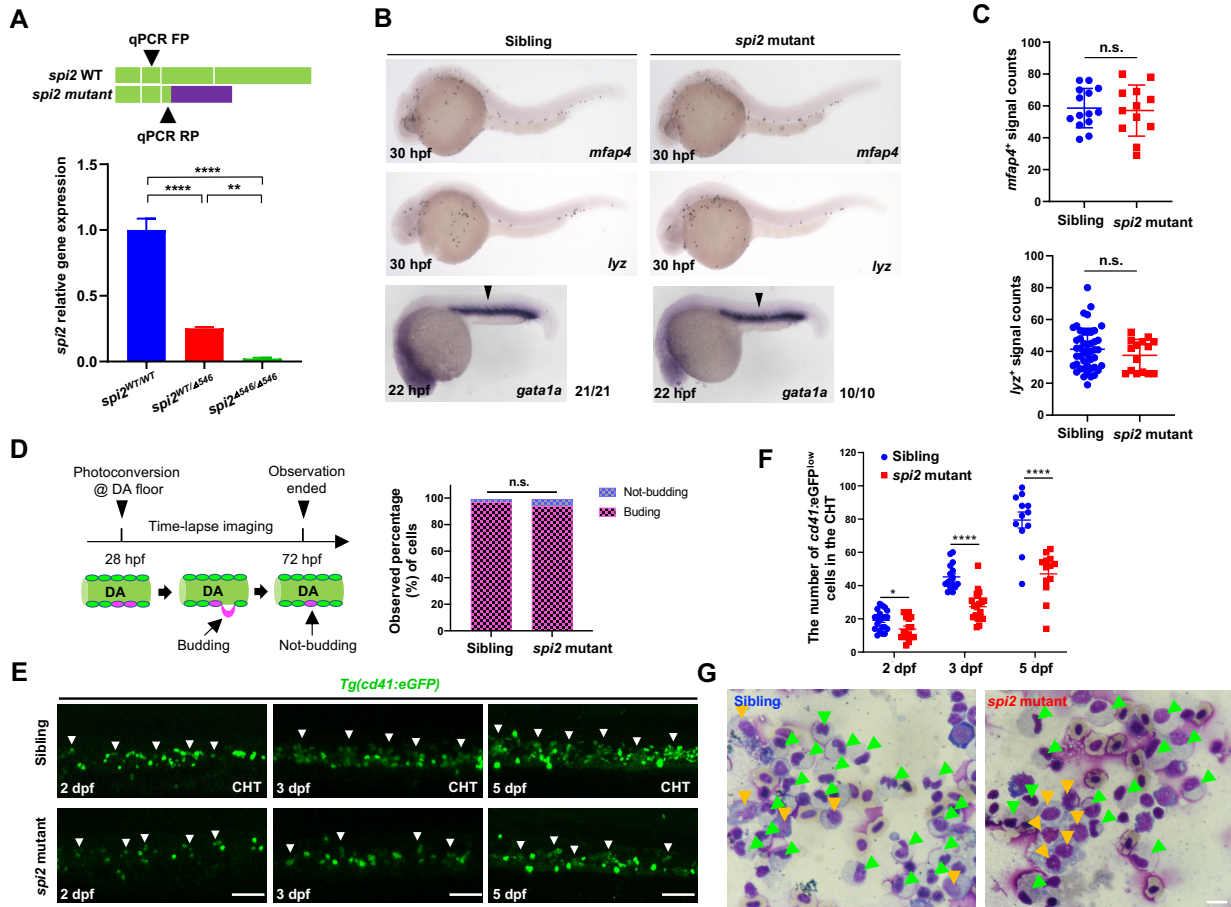**Fig. S3. Primitive hematopoiesis and EHT analysis in *spi2* mutants.**

(A) qPCR analysis of *spi2* N-terminal transcripts in WT, *spi2*<sup>+/ $\Delta$ 546</sup> heterozygous, and *spi2* <sup>$\Delta$ 546/ $\Delta$ 546</sup> homozygous embryos (the number of clutches of embryos, n = 3/4/4 for WT, *spi2*<sup>+/ $\Delta$ 546</sup>, and *spi2* <sup>$\Delta$ 546/ $\Delta$ 546</sup> respectively). (B) WISH of *mfap4*, *lyz*, and *gata1a* in *spi2* mutants and siblings at 22 hpf and 30 hpf. (C) Quantification of *mfap4* (siblings, n = 14; *spi2* mutants, n = 12) and *lyz* (siblings, n = 46; *spi2* mutants, n = 15) positive cells in B. (D) Diagram showing photoconversion and time-lapse imaging strategy to track EHT process and the percentage quantification of the observed cell behaviors in *spi2* mutants (embryo n = 5; photoconverted ECs n = 38; budding ECs n = 36) and siblings (embryo n = 6; photoconverted ECs n = 41; budding ECs n = 40). (E) Representative images of *Tg(cd41:eGFP)* in the CHT at 2 dpf and 3 dpf in *spi2* mutants and siblings. (F) Quantification of the *cd41:eGFP*<sup>low</sup> cells in the CHT at 2 dpf and 3 dpf in *spi2* mutants and siblings in E. 2/3/5 dpf siblings, n = 21/16/12; 2/3/5 dpf *spi2* mutants, n = 15/21/13. (G) Representative MGG staining image in *spi2* mutants and siblings. Green triangles indicate myeloid cells. Orange triangles indicate myeloblasts. Scale bar, 20  $\mu$ m. n/N reports the number of embryos with staining pattern in image/total embryos. Data are represented as mean  $\pm$  SD, \*p < 0.05, \*\*p < 0.01, \*\*\*\*p < 0.0001, n.s. not significant (p > 0.05). Student's t test used in A, C, and F. Fisher test used in D.

Figure S4

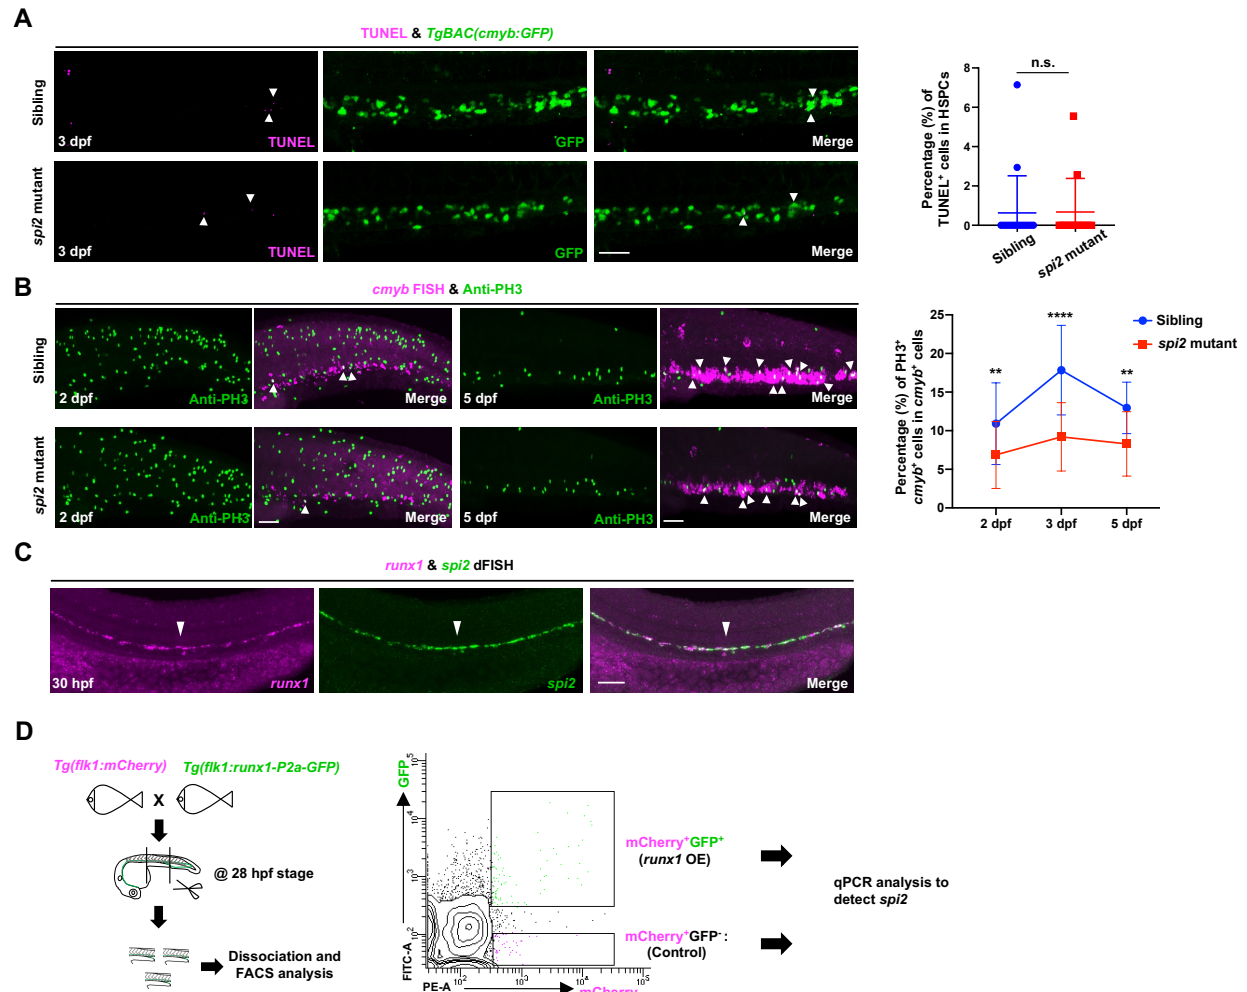

**Fig. S4. TUNEL staining of HSPCs and colocalization of *spi2* and *runx1* in the HECs.**

(A) TUNEL analysis (magenta) combined with GFP immunofluorescent staining in the CHT in *TgBAC(cmyb:GFP)* of *spi2* mutants and siblings at 3 dpf and the quantification of the percentage of TUNEL<sup>+</sup>GFP<sup>+</sup>/GFP<sup>+</sup> HSPCs in *spi2* mutants (n = 12) and siblings (n = 16). (B) Representative images of *cmyb* FISH (magenta) and anti-PH3 immunofluorescent staining (green) in the CHT in *spi2* mutants and siblings at 2 dpf and 5 dpf, and the quantification of the percentage of proliferating *cmyb*<sup>+</sup>PH3<sup>+</sup> cells in the CHT in *spi2* mutants (n = 18, 18, 18) and siblings (n = 54, 35, 18) at 2, 3 and 5 dpf. (C) dFISH of *spi2* and *runx1* in the AGM in WT fish at 30 hpf. (D) FACS isolation of HECs and cECs from the trunk region of the progenies (28 hpf stage) of *Tg(flk1:mCherry)* crossing with *Tg(flk1:runx1-P2a-GFP)* zebrafish. *runx1* OE, ECs with *runx1* overexpression; Control, ECs without *runx1* overexpression. Student's t tests used in A and B. Data are represented as mean ± SD, n.s. not significant (p > 0.05). Scale bars, 60 μm.

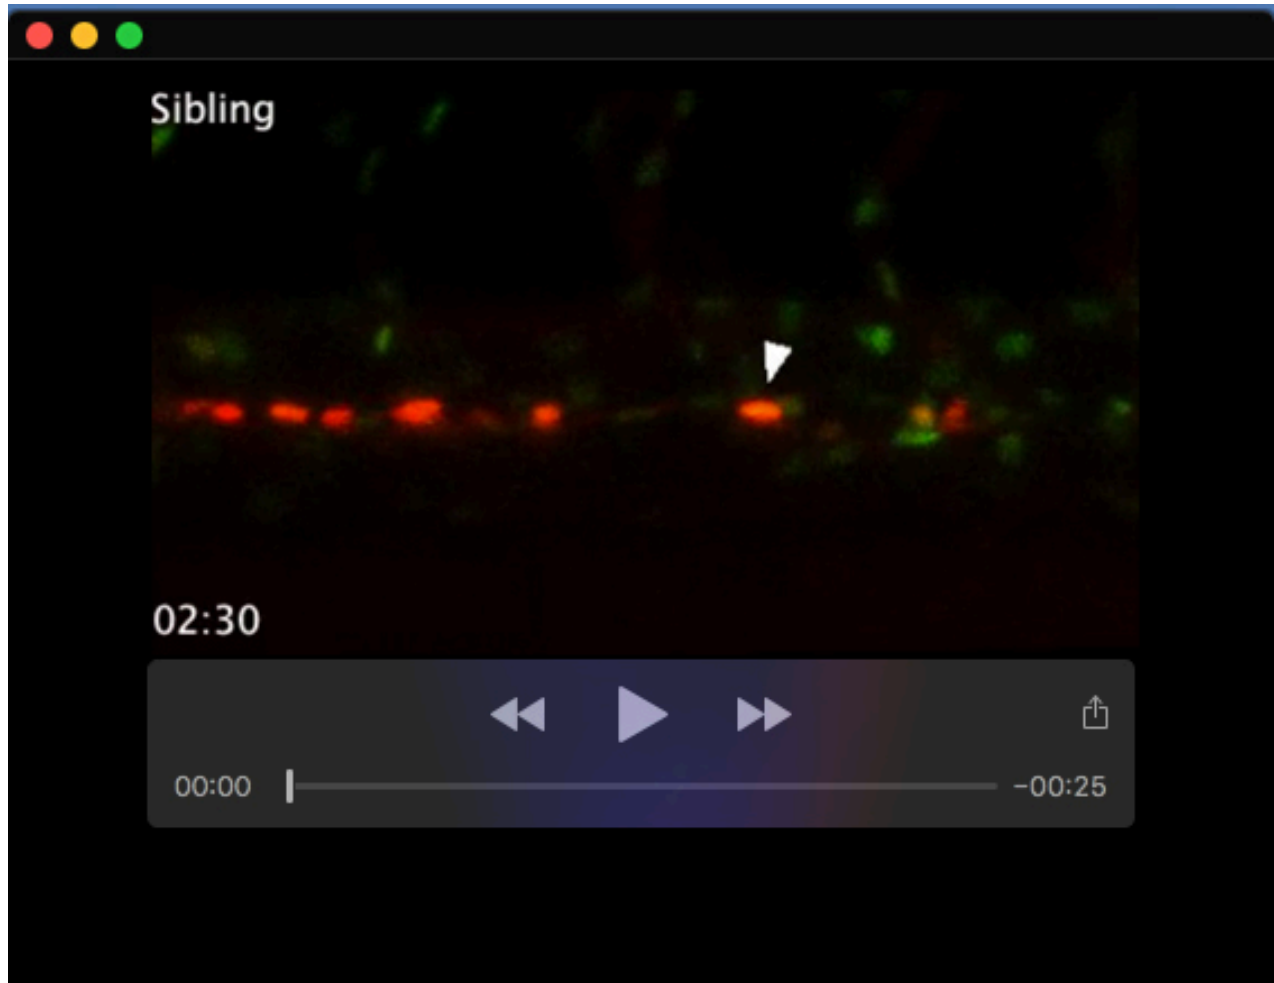

**Movie 1. Time-lapse imaging tracks the EHT process in *spi2* siblings.**

Photoconverted HECs are labelled in red color. Lines denote DA roof and floor, and triangles denote an example of observed HEC in a *spi2* sibling embryo.

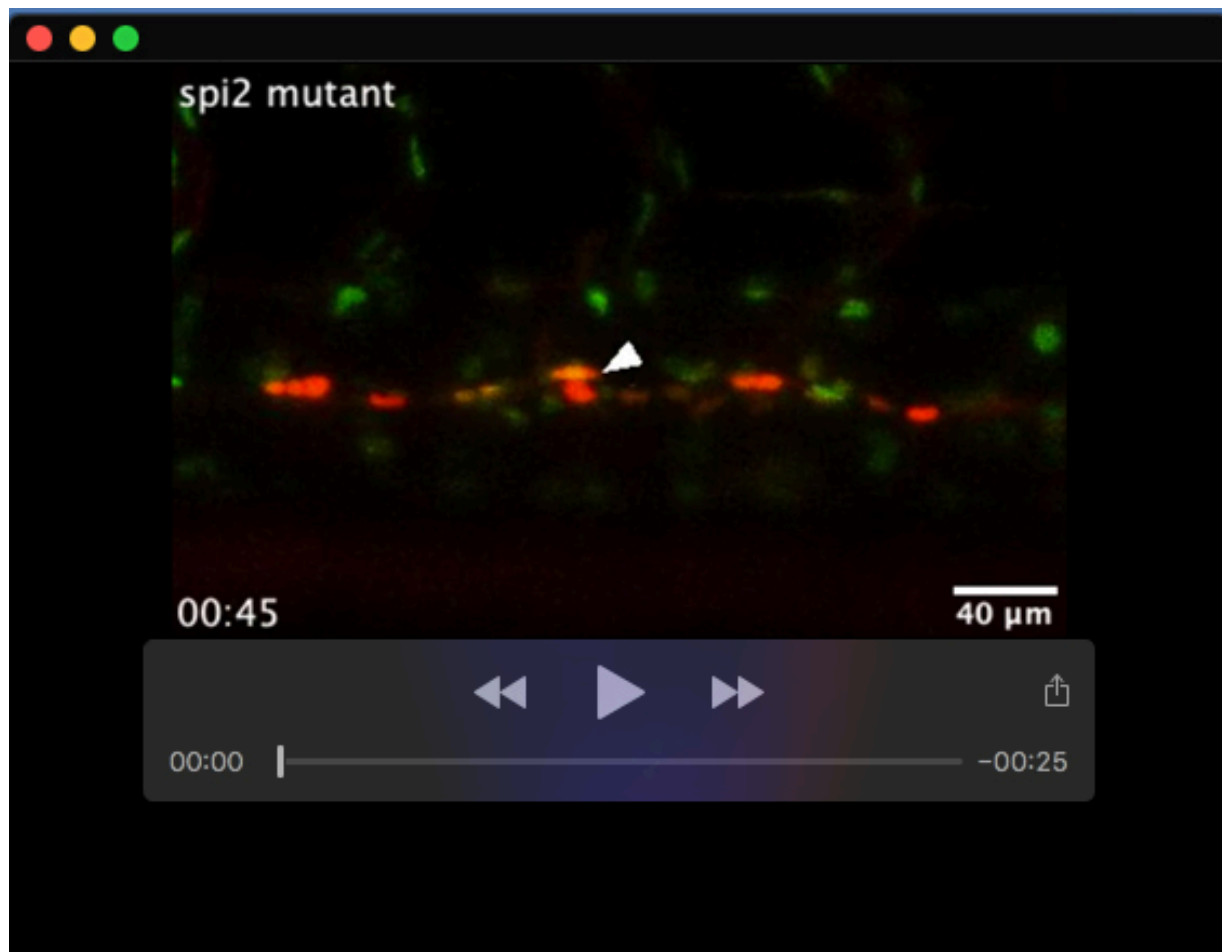

**Movie 2. Time-lapse imaging tracks the EHT process in *spi2* mutants.**

Photoconverted HECs are labelled in red color. Lines denote DA roof and floor, and triangles denote an example of observed HEC in a *spi2* mutant embryo.
